# Supplementary material for: A Retrospective Study on the Use of Chinese Patent Medicine in 24 Medical Institutions for COVID-19 in China
Source: PubMed Central journal article supplement (PMC7990099; doi:10.3389/fphar.2020.574562), 2020-11-30
Supplement: datasheet1.pdf [file datasheet1.pdf]

## Appendix 1

Table1 Frequently-used Traditional Chinese Medicine in 24 hospitals

| Name                              | Frequency | Percentage |
|-----------------------------------|-----------|------------|
| Lianhua Qingwen granule (capsule) | 10        | 31%        |
| Lanqin oral liquid                | 7         | 21%        |
| Jinhua Qinggan granule            | 5         | 15%        |
| Bailing capsule(tablet)           | 4         | 12%        |
| Huachansu capsule(tablet)         | 3         | 9%         |
| Naoxintong capsule                | 2         | 6%         |
| Antivirus oral liquid             | 2         | 6%         |

Table2 Utilization rate of Chinese patent medicine in high-risk area

| Name                               | Frequency | Percentage |
|------------------------------------|-----------|------------|
| Lianhua Qingwen granule (capsule)  | 9         | 20%        |
| Lanqin oral liquid                 | 7         | 16%        |
| Jinhua Qinggan granule             | 5         | 11%        |
| Bailing capsule(tablet)            | 3         | 7%         |
| Huachansu capsule                  | 2         | 5%         |
| Antivirus oral liquid              | 2         | 5%         |
| Banlangen granule                  | 1         | 2%         |
| Qingfei pill                       | 1         | 2%         |
| Xuanfei Zhisou mixture             | 1         | 2%         |
| Feilike mixture                    | 1         | 2%         |
| Yupingfeng granule                 | 1         | 2%         |
| Qingqiao Kangdu granule            | 1         | 2%         |
| Jingyin mixture                    | 1         | 2%         |
| Compound Xianzhuli liquid          | 1         | 2%         |
| Shiwei Longdanhua granule          | 1         | 2%         |
| Chonglian oral liquid              | 1         | 2%         |
| Compound shuanghua tablet          | 1         | 2%         |
| Pudilan antiphlogistic oral liquid | 1         | 2%         |
| Huangkui capsule                   | 1         | 2%         |
| Shufeng Jiedu capsule              | 1         | 2%         |
| Shengxuebao mixture                | 1         | 2%         |
| Maxing Huatan mixture              | 1         | 2%         |
| Compound Daqing granule            | 1         | 2%         |

Table3 Utilization rate of Chinese patent medicine in low-risk area

| Name                                 |                               |                        |                       |
|--------------------------------------|-------------------------------|------------------------|-----------------------|
| Modified Shuanghuanglian oral liquid | Shensong Yangxin capsule      | Rougan Hepi pill       | Relinqing granule     |
| Bailing capsule                      | Xuefu Zhuyu capsule           | Naoxintong capsule     | Zukamu granule        |
| Yinxing Mihuan oral liquid           | Guanxin Danshen dropping pill | Qingfei Huatan mixture | Suhuang Zhike capsule |
| Lianhua Qingwen granule              | Jinshuibao pill               | Huachansu tablet       | Danqi soft capsule    |
| Compound Danshen dropping pill       | Zhizhu Kuanzhong capsule      | Yimucao capsule        |                       |

Table4 Utilization rate of Chinese patent medicine in southern region

| Name                               | Frequency | Percentage |
|------------------------------------|-----------|------------|
| Lianhua Qingwen granule(capsule)   | 6         | 21%        |
| Lanqin oral liquid                 | 4         | 14%        |
| Bailingcapsule(tablet)             | 3         | 10%        |
| Huachansucapsule                   | 2         | 7%         |
| Shufeng Jiedu capsule              | 1         | 3.4%       |
| Antivirus oral liquid              | 1         | 3.4%       |
| Shengxuebao mixture                | 1         | 3.4%       |
| Pudilan antiphlogistic oral liquid | 1         | 3.4%       |
| Xuanfei Zhisou mixture             | 1         | 3.4%       |
| Feilike mixture                    | 1         | 3.4%       |
| Maxing Huatan mixture              | 1         | 3.4%       |
| Qingqiao Kangdu granule            | 1         | 3.4%       |
| Jingyin mixture                    | 1         | 3.4%       |
| Chonglian oral liquid              | 1         | 3.4%       |
| Compound Daqing granule            | 1         | 3.4%       |
| Yupingfeng granule                 | 1         | 3.4%       |
| Huaier granule                     | 1         | 3.4%       |
| Naoxintong capsule                 | 1         | 3.4%       |

Table5 Utilization rate of Chinese patent medicine in northern region

| Name                    | Frequency | Percentage |
|-------------------------|-----------|------------|
| Jinhua Qinggan granule  | 5         | 13%        |
| Lianhua Qingwen granule | 4         | 10%        |
| Lanqin oral liquid      | 3         | 8%         |
| Antivirus oral liquid   | 1         | 2.7%       |

|                                      |   |      |
|--------------------------------------|---|------|
| Banlangen granule                    | 1 | 2.7% |
| Compound Xianzhuli liquid            | 1 | 2.7% |
| Shiwei Longdanhua granule            | 1 | 2.7% |
| Zukamu granule                       | 1 | 2.7% |
| Qingfei pill                         | 1 | 2.7% |
| Compound shuanghua tablet            | 1 | 2.7% |
| Honghua Qinggan thirteen pill        | 1 | 2.7% |
| Su Huang Zhike capsule               | 1 | 2.7% |
| Huangkui capsule                     | 1 | 2.7% |
| Qingfei Huatan mixture               | 1 | 2.7% |
| Relinqing granule                    | 1 | 2.7% |
| Modified Shuanghuanglian oral liquid | 1 | 2.7% |
| Huachansu tablet                     | 1 | 2.7% |
| Bailingcapsule                       | 1 | 2.7% |
| Shensong Yangxin                     | 1 | 2.7% |
| Zhizhu Kuanzhong capsule             | 1 | 2.7% |
| Rougan Hepi pill                     | 1 | 2.7% |
| Jinshuibao pill                      | 1 | 2.7% |
| Peiyuan Tongnao capsule              | 1 | 2.7% |
| Yinxing Mihuan oral liquid           | 1 | 2.7% |
| Xuefu Zhuyu capsule                  | 1 | 2.7% |
| Naoxintong capsule                   | 1 | 2.7% |
| Compound Danshen dropping pill       | 1 | 2.7% |
| Guanxin Danshen dropping pill        | 1 | 2.7% |
| Danqi soft capsule                   | 1 | 2.7% |

Table6 Utilization rate of Chinese patent medicine in TCM hospital

| Name                               | Frequency | Percentage |
|------------------------------------|-----------|------------|
| Lianhua Qingwengranule(capsule)    | 8         | 15%        |
| Bailingcapsule(tablet)             | 4         | 7%         |
| Lanqin oral liquid                 | 3         | 6%         |
| Naoxintong capsule                 | 2         | 4%         |
| Jinhua Qinggan granule             | 2         | 4%         |
| Huachansu capsule                  | 2         | 4%         |
| Banlangen granule                  | 1         | 2%         |
| Antivirus oral liquid              | 1         | 2%         |
| Shufeng Jiedu capsule              | 1         | 2%         |
| Compound Daqing granule            | 1         | 2%         |
| Jingyin mixture                    | 1         | 2%         |
| Qingqiao Kangdu granule            | 1         | 2%         |
| Pudilan antiphlogistic oral liquid | 1         | 2%         |
| Chonglian oral liquid              | 1         | 2%         |
| Qingfei pill                       | 1         | 2%         |

|                                      |   |    |
|--------------------------------------|---|----|
| Zukamu granule                       | 1 | 2% |
| Huachansu tablet                     | 1 | 2% |
| Huangkui capsule                     | 1 | 2% |
| Qingfei Huatan mixture               | 1 | 2% |
| Maxing Huatan mixture                | 1 | 2% |
| Relinqing granule                    | 1 | 2% |
| Honghua Qinggan thirteen pill        | 1 | 2% |
| Modified Shuanghuanglian oral liquid | 1 | 2% |
| Su Huang Zhike capsule               | 1 | 2% |
| Xuanfei Zhisou mixture               | 1 | 2% |
| Yupingfeng granule                   | 1 | 2% |
| Shengxuebao mixture                  | 1 | 2% |
| Shensong Yangxin                     | 1 | 2% |
| Jinshuibao pill                      | 1 | 2% |
| Rougan Hepi pill                     | 1 | 2% |
| Zhizhu Kuanzhong capsule             | 1 | 2% |
| Xuefu Zhuyu capsule                  | 1 | 2% |
| Compound Danshen dropping pill       | 1 | 2% |
| Guanxin Danshen dropping pill        | 1 | 2% |
| Danqi soft capsule                   | 1 | 2% |
| Yinxing Mihuan oral liquid           | 1 | 2% |

Table7 Utilization rate of Chinese patent medicine in western medical hospital

| Name                      | Frequency | Percentage |
|---------------------------|-----------|------------|
| Lanqin oral liquid        | 4         | 23%        |
| Jinhua Qinggan granule    | 3         | 17%        |
| Lianhua Qingwen granule   | 2         | 12%        |
| Antivirus oral liquid     | 1         | 7%         |
| Compound Xianzhuli liquid | 1         | 7%         |
| Compound shuanghua tablet | 1         | 7%         |
| Shiwei Longdanhua granule | 1         | 7%         |
| Feilike mixture           | 1         | 7%         |
| Huaier granule            | 1         | 7%         |
| Peiyuan Tongnao capsule   | 1         | 7%         |
| Kangfuxin liquid          | 1         | 7%         |

Table8 Frequently-used Traditional Chinese Medicine in 24 hospitals

| Name                           | Frequency | Percentage |
|--------------------------------|-----------|------------|
| Bailingcapsule(tablet)         | 7         | 9%         |
| Compound Danshen dropping pill | 6         | 8%         |
| Lianhua Qingwen                | 5         | 7%         |

|                               |   |    |
|-------------------------------|---|----|
| capsule(granule)              |   |    |
| Naoxintong capsule            | 5 | 7% |
| Jinshuibao pill               | 4 | 5% |
| Huangkui capsule              | 2 | 3% |
| Compound Xueshuantong capsule | 2 | 3% |
| Xinyuan capsule               | 2 | 3% |
| Shensong Yangxin              | 2 | 3% |
| Linaoxin tablet               | 2 | 3% |
| Tiandan Tongluo capsule       | 2 | 3% |
| Ginkgo tablet (drop pill)     | 2 | 3% |

Table9 Utilization rate of Chinese patent medicine in high-risk area

| <b>Name</b>                     | <b>Frequency</b> | <b>Percentage</b> |
|---------------------------------|------------------|-------------------|
| Lianhua Qingwengranule(capsule) | 4                | 7%                |
| Bailingcapsule(tablet)          | 4                | 7%                |
| Compound Danshen dropping pill  | 4                | 7%                |
| Jinshuibao pill                 | 3                | 5%                |
| Naoxintong capsule              | 2                | 3%                |
| Linaoxin tablet                 | 2                | 3%                |
| Xinyuan capsule                 | 2                | 3%                |
| Tiandan Tongluo capsule         | 2                | 3%                |
| Xuebijing injection             | 1                | 2%                |
| Xiyanping injection             | 1                | 2%                |
| Jinhua Qinggan granule          | 1                | 2%                |
| Lanqin oral liquid              | 1                | 2%                |
| Chonglian oral liquid           | 1                | 2%                |
| Jingyin mixture                 | 1                | 2%                |
| Banlangen granule               | 1                | 2%                |
| Huangkui capsule                | 1                | 2%                |
| Compound Daqing granule         | 1                | 2%                |
| Maxing Huatan mixture           | 1                | 2%                |
| Feilike mixture                 | 1                | 2%                |
| Compound Huangqi jiedu mixture  | 1                | 2%                |
| Honghua Qinggan pill            | 1                | 2%                |
| Babaodan capsule                | 1                | 2%                |
| Yindan Xinnaotong soft capsule  | 1                | 2%                |
| Tongluo Yiqi pill               | 1                | 2%                |
| Naoshuantong capsule            | 1                | 2%                |
| Xiaoshuan Changyong capsule     | 1                | 2%                |
| Qili Qiangxin capsule           | 1                | 2%                |
| Xiaoshuan Tongluo capsule       | 1                | 2%                |
| Xueshuan Xinmaining tablet      | 1                | 2%                |
| Sanqi Shutong capsule           | 1                | 2%                |
| Xiongdan capsule                | 1                | 2%                |
| Ginkgo drop pill                | 1                | 2%                |

|                               |   |    |
|-------------------------------|---|----|
| Xueshuantong granule          | 1 | 2% |
| Compound Xueshuantong capsule | 1 | 2% |
| Shexiang Baoxin pill          | 1 | 2% |
| Yupingfeng granule            | 1 | 2% |
| Peiyuan Tongnao capsule       | 1 | 2% |
| Shenyan Kangfu tablet         | 1 | 2% |
| Zhenyuan capsule              | 1 | 2% |
| Kangfuxin liquid              | 1 | 2% |
| Yixinshu capsule              | 1 | 2% |
| Shenqi Gankang capsule        | 1 | 2% |

Table10 Utilization rate of Chinese patent medicine in low-risk area

| Name                           | Frequency | Percentage |
|--------------------------------|-----------|------------|
| Bailing capsule                | 3         | 14%        |
| Naoxintong capsule             | 3         | 14%        |
| Compound Danshen dropping pill | 2         | 9%         |
| Shensong Yangxin capsule       | 2         | 9%         |
| Lianhua Qingwen granule        | 1         | 4.5%       |
| Qingfei Huatan mixture         | 1         | 4.5%       |
| Huangkui capsule               | 1         | 4.5%       |
| Qishen Yiqi drop pill          | 1         | 4.5%       |
| Wenxin granule                 | 1         | 4.5%       |
| Jinshuibao pill                | 1         | 4.5%       |
| Shenkangfu capsule 2           | 1         | 4.5%       |
| Ginkgo tablet                  | 1         | 4.5%       |
| Tongxinluo capsule             | 1         | 4.5%       |
| Xuefu Zhuyu granule            | 1         | 4.5%       |
| Yuxuebi capsule                | 1         | 4.5%       |
| Compound Xueshuantong capsule  | 1         | 4.5%       |

Table11 Utilization rate of Chinese patent medicine in southern region

| Name                            | Frequency | Percentage |
|---------------------------------|-----------|------------|
| Bailingcapsule(tablet)          | 4         | 11%        |
| Lianhua Qingwengranule(capsule) | 3         | 8%         |
| Compound Danshen dropping pill  | 3         | 8%         |
| Naoxintong capsule              | 2         | 5%         |
| Xiyanping injection             | 1         | 3%         |

|                                |   |    |
|--------------------------------|---|----|
| Xuebijing injection            | 1 | 3% |
| Lanqin oral liquid             | 1 | 3% |
| Chonglian oral liquid          | 1 | 3% |
| Jingyin mixture                | 1 | 3% |
| Compound Huangqi jiedu mixture | 1 | 3% |
| Compound Daqing granule        | 1 | 3% |
| Maxing Huatan mixture          | 1 | 3% |
| Feilike mixture                | 1 | 3% |
| Honghua Qinggan pill           | 1 | 3% |
| Babaodan capsule               | 1 | 3% |
| Ginkgo drop pill               | 1 | 3% |
| Shexiang Baoxin pill           | 1 | 3% |
| Yindan Xinnaotong soft capsule | 1 | 3% |
| Naoshuantong capsule           | 1 | 3% |
| Tiandan Tongluo capsule        | 1 | 3% |
| Tongluo Yiqi pill              | 1 | 3% |
| Xiaoshuan Changyong capsule    | 1 | 3% |
| Xiongdan capsule               | 1 | 3% |
| Jinshuibao pill                | 1 | 3% |
| Yixinshu capsule               | 1 | 3% |
| Yupingfeng granule             | 1 | 3% |
| Shenqi Duotang oral liquid     | 1 | 3% |
| Shenyan Kangfu tablet          | 1 | 3% |
| Shenqi Gankang capsule         | 1 | 3% |

Table12 Utilization rate of Chinese patent medicine in northern region

| Name                           | Frequency | Percentage |
|--------------------------------|-----------|------------|
| Bailing capsule                | 3         | 7%         |
| Naoxintong capsule             | 3         | 7%         |
| Jinshuibao pill                | 3         | 7%         |
| Compound Danshen dropping pill | 3         | 7%         |
| Lianhua Qingwen granule        | 2         | 5%         |
| Huangkui capsule               | 2         | 5%         |
| Xinyuan capsule                | 2         | 5%         |

|                               |   |    |
|-------------------------------|---|----|
| Shensong Yangxin              | 2 | 5% |
| Linaoxin tablet               | 2 | 5% |
| Compound Xueshuantong capsule | 2 | 5% |
| Jinhua Qinggan granule        | 1 | 2% |
| Qingfei Huatan mixture        | 1 | 2% |
| Banlangen granule             | 1 | 2% |
| Ginkgo tablet                 | 1 | 2% |
| Xuefu Zhuyugranule            | 1 | 2% |
| Xueshuantong granule          | 1 | 2% |
| Tongxinluo capsule            | 1 | 2% |
| Qili Qiangxin capsule         | 1 | 2% |
| Sanqi Shutong capsule         | 1 | 2% |
| Yuxuebi capsule               | 1 | 2% |
| Tiandan Tongluo capsule       | 1 | 2% |
| Xiaoshuan Tongluo capsule     | 1 | 2% |
| Xueshuan Xinmaining tablet    | 1 | 2% |
| Kangfuxin liquid              | 1 | 2% |
| Zhenyuan capsule              | 1 | 2% |
| Wenxin granule                | 1 | 2% |
| Qishen Yiqi drop pill         | 1 | 2% |
| Shenkangfu capsule 2          | 1 | 2% |
| Peiyuan Tongnao capsule       | 1 | 2% |

Table13 Utilization rate of Chinese patent medicine in TCM hospital

| Name                            | Frequency | Percentage |
|---------------------------------|-----------|------------|
| Bailingcapsule(tablet)          | 7         | 12%        |
| Compound Danshen dropping pill  | 5         | 8%         |
| Lianhua Qingwengranule(capsule) | 4         | 7%         |
| Naoxintong capsule              | 4         | 7%         |
| Jinshuibao pill                 | 3         | 5%         |
| Huangkui capsule                | 2         | 3%         |
| Shensong Yangxin                | 2         | 3%         |
| Compound Xueshuantong capsule   | 2         | 3%         |
| Xiyanping injection             | 1         | 2%         |
| Xuebijing injection             | 1         | 2%         |
| Maxing Huatan mixture           | 1         | 2%         |
| Jingyin mixture                 | 1         | 2%         |
| Chonglian oral liquid           | 1         | 2%         |



|                                |   |    |
|--------------------------------|---|----|
| Qingfei Huatan mixture         | 1 | 2% |
| Compound Daqing granule        | 1 | 2% |
| Honghua Qinggan pill           | 1 | 2% |
| Compound Huangqi jiedu mixture | 1 | 2% |
| Babaodan capsule               | 1 | 2% |
| Ginkgo tablet                  | 1 | 2% |
| Tongxinluo capsule             | 1 | 2% |
| Tongluo Yiqi pill              | 1 | 2% |
| Linaoxin tablet                | 1 | 2% |
| Tiandan Tongluo capsule        | 1 | 2% |
| Naoshuantong capsule           | 1 | 2% |
| Xueshuantong granule           | 1 | 2% |
| Yuxuebi capsule                | 1 | 2% |
| Xiongdan capsule               | 1 | 2% |
| Shexiang Baoxin pill           | 1 | 2% |
| Xuefu Zhuyugranule             | 1 | 2% |
| Qili Qiangxin capsule          | 1 | 2% |
| Shenqi Duotang oral liquid     | 1 | 2% |
| Wenxin granule                 | 1 | 2% |
| Yupingfeng granule             | 1 | 2% |
| Qishen Yiqi drop pill          | 1 | 2% |
| Peiyuan Tongnao capsule        | 1 | 2% |
| Shenyan Kangfu tablet          | 1 | 2% |
| Shenkangfu capsule 2           | 1 | 2% |

Table14 Utilization rate of Chinese patent medicine in western medical hospital

| Name                           | Frequency | Percentage |
|--------------------------------|-----------|------------|
| Xinyuan capsule                | 2         | 11%        |
| Lianhua Qingwen granule        | 1         | 6%         |
| Jinhua Qinggan granule         | 1         | 6%         |
| Lanqin oral liquid             | 1         | 6%         |
| Banlangen granule              | 1         | 6%         |
| Feilike mixture                | 1         | 6%         |
| Sanqi Shutong capsule          | 1         | 6%         |
| Tiandan Tongluo capsule        | 1         | 6%         |
| Xiaoshuan Tongluo capsule      | 1         | 6%         |
| Xueshuan Xinmaining tablet     | 1         | 6%         |
| Linaoxin tablet                | 1         | 6%         |
| Yindan Xinnaotong soft capsule | 1         | 6%         |

|                  |   |    |
|------------------|---|----|
| Jinshuibao pill  | 1 | 6% |
| Kangfuxin liquid | 1 | 6% |
| Zhenyuan capsule | 1 | 6% |
| Yixinshu capsule | 1 | 6% |

Table15 Frequently-used Traditional Chinese Medicine in 24 hospitals

| Name                             | Frequency | Percentage |
|----------------------------------|-----------|------------|
| Bailingcapsule(tablet)           | 7         | 9%         |
| Compound Danshen dropping pill   | 6         | 7%         |
| Naoxintong capsule               | 5         | 6%         |
| Jinshuibao pill                  | 4         | 5%         |
| Shensong Yangxin                 | 4         | 5%         |
| Lianhua Qingwen granule(capsule) | 4         | 5%         |
| Huangkui capsule                 | 3         | 4%         |
| Compound Xueshuantong capsule    | 2         | 2%         |
| Ginkgo drop pill(tablet)         | 2         | 2%         |

Table16 Utilization rate of Chinese patent medicine in high-risk area

| Name                             | Frequency | Percentage |
|----------------------------------|-----------|------------|
| Bailing capsule(tablet)          | 6         | 9%         |
| Lianhua Qingwen granule(capsule) | 4         | 6%         |
| Compound Danshen dropping pill   | 4         | 6%         |
| Jinshuibao pill                  | 4         | 6%         |
| Naoxintong capsule               | 4         | 6%         |
| Huangkui capsule                 | 3         | 5%         |
| Shensong Yangxin                 | 2         | 3%         |
| Ginkgo tablet (drop pill)        | 2         | 3%         |
| Xiyanping injection              | 1         | 1.6%       |
| Xuebijing injection              | 1         | 1.6%       |
| Jinhua Qinggan granule           | 1         | 1.6%       |
| Lanqin oral liquid               | 1         | 1.6%       |
| Compound Huangqi jiedu mixture   | 1         | 1.6%       |
| Compound Daqing granule          | 1         | 1.6%       |
| Antivirus oral liquid            | 1         | 1.6%       |
| Huachansucapsule                 | 1         | 1.6%       |
| Maxing Huatan mixture            | 1         | 1.6%       |
| Honghua Qinggan pill             | 1         | 1.6%       |

|                                |   |      |
|--------------------------------|---|------|
| Feilike mixture                | 1 | 1.6% |
| Zhenbao pill                   | 1 | 1.6% |
| Shengxuebao mixture            | 1 | 1.6% |
| Shenqi Duotang oral liquid     | 1 | 1.6% |
| Dengzhan Shengmaicapsule       | 1 | 1.6% |
| Xinyuan capsule                | 1 | 1.6% |
| Wenxin granule                 | 1 | 1.6% |
| Linglingcapsule                | 1 | 1.6% |
| Xintong oral liquid            | 1 | 1.6% |
| Shenqi Gankang capsule         | 1 | 1.6% |
| Yishen Huashi granule          | 1 | 1.6% |
| Congrong Yishen granule        | 1 | 1.6% |
| Compound Congrong Yizhicapsule | 1 | 1.6% |
| Shenyan Kangfu tablet          | 1 | 1.6% |
| Shenshuainingcapsule           | 1 | 1.6% |
| Xuefu Zhuyu capsule            | 1 | 1.6% |
| Compound Xueshuantong capsule  | 1 | 1.6% |
| Xueshuantong granule           | 1 | 1.6% |
| Qili Qiangxin capsule          | 1 | 1.6% |
| Sanqi Shutongcapsule           | 1 | 1.6% |
| Xueshuan Xinmaining tablet     | 1 | 1.6% |
| Xiaoshuan Changyong capsule    | 1 | 1.6% |
| Linaoxin tablet                | 1 | 1.6% |
| Tiandan Tongluo capsule        | 1 | 1.6% |
| Xiongdan capsule               | 1 | 1.6% |

Table17 Utilization rate of Chinese patent medicine in low-risk area

| Name                           | Frequency | Percentage |
|--------------------------------|-----------|------------|
| Bailing capsule                | 2         | 10%        |
| Compound Danshen dropping pill | 2         | 10%        |
| Shensong Yangxin               | 2         | 10%        |
| Yifei Jiedu granule            | 1         | 5%         |
| Yichuanpingcapsule             | 1         | 5%         |
| Naoxintong capsule             | 1         | 5%         |
| Yuxuebi capsule                | 1         | 5%         |
| Danqicapsule                   | 1         | 5%         |
| Tongxinluo capsule             | 1         | 5%         |
| Xuefu Zhuyu capsule            | 1         | 5%         |

|                               |   |    |
|-------------------------------|---|----|
| Compound Xueshuantong capsule | 1 | 5% |
| Jinshuibao pill               | 1 | 5% |
| Shenkangfu capsule 2          | 1 | 5% |
| Xianling Gubaocapsule         | 1 | 5% |
| Fufang Xuanjucapsule          | 1 | 5% |
| Rougan Hepi pill              | 1 | 5% |
| Zhizhu Kuanzhong capsule      | 1 | 5% |

Table18 Utilization rate of Chinese patent medicine in southern region

| <b>Name</b>                     | <b>Frequency</b> | <b>Percentage</b> |
|---------------------------------|------------------|-------------------|
| Lianhua Qingwengranule(capsule) | 3                | 8%                |
| Bailingcapsule(tablet)          | 3                | 8%                |
| Naoxintong capsule              | 3                | 8%                |
| Compound Danshen dropping pill  | 3                | 8%                |
| Xuebijing injection             | 1                | 2.6%              |
| Xiyanping injection             | 1                | 2.6%              |
| Lanqin oral liquid              | 1                | 2.6%              |
| Antivirus oral liquid           | 1                | 2.6%              |
| Compound Huangqi jiedu mixture  | 1                | 2.6%              |
| Compound Daqing granule         | 1                | 2.6%              |
| Maxing Huatan mixture           | 1                | 2.6%              |
| Huachansu capsule               | 1                | 2.6%              |
| Honghua Qinggan pill            | 1                | 2.6%              |
| Huangkui capsule                | 1                | 2.6%              |
| Feilike mixture                 | 1                | 2.6%              |
| Jinshuibao pill                 | 1                | 2.6%              |
| Shengxuebao mixture             | 1                | 2.6%              |
| Dengzhan Shengmai capsule       | 1                | 2.6%              |
| Lingling capsule                | 1                | 2.6%              |
| Shenqi Duotang oral liquid      | 1                | 2.6%              |
| Wenxin granule                  | 1                | 2.6%              |
| Congrong Yishen granule         | 1                | 2.6%              |
| Yishen Huashi granule           | 1                | 2.6%              |
| Shenqi Gankang capsule          | 1                | 2.6%              |

|                             |   |      |
|-----------------------------|---|------|
| Ginkgo drop pill            | 1 | 2.6% |
| Xiaoshuan Changyong capsule | 1 | 2.6% |
| Tiandan Tongluo capsule     | 1 | 2.6% |
| Shenshuainingcapsule        | 1 | 2.6% |
| Shenyan Kangfu tablet       | 1 | 2.6% |
| Xiongdan capsule            | 1 | 2.6% |

Table19 Utilization rate of Chinese patent medicine in northern region

| Name                           | Frequency | Percentage |
|--------------------------------|-----------|------------|
| Bailing capsule                | 4         | 9%         |
| Shensong Yangxin               | 4         | 9%         |
| Jinshuibao pill                | 3         | 7%         |
| Compound Danshen dropping pill | 3         | 7%         |
| Naoxintong capsule             | 2         | 5%         |
| Huangkui capsule               | 2         | 5%         |
| Compound Xueshuantong capsule  | 2         | 5%         |
| Lianhua Qingwen granule        | 1         | 2.3%       |
| Jinhua Qinggan granule         | 1         | 2.3%       |
| Yifei Jiedu granule            | 1         | 2.3%       |
| Yichuanpingcapsule             | 1         | 2.3%       |
| Zhenbao pill                   | 1         | 2.3%       |
| Ginkgo tablet                  | 1         | 2.3%       |
| Danqi capsule                  | 1         | 2.3%       |
| Sanqi Shutong capsule          | 1         | 2.3%       |
| Xueshuantong granule           | 1         | 2.3%       |
| Tongxinluo capsule             | 1         | 2.3%       |
| Xueshuan Xinmaining tablet     | 1         | 2.3%       |
| Qili Qiangxin capsule          | 1         | 2.3%       |
| Linaoxin tablet                | 1         | 2.3%       |
| Yuxuebi capsule                | 1         | 2.3%       |
| Xintong oral liquid            | 1         | 2.3%       |
| Xuefu Zhuyu capsule            | 1         | 2.3%       |
| Xinyuan capsule                | 1         | 2.3%       |

|                                 |   |      |
|---------------------------------|---|------|
| Xianling Gubao capsule          | 1 | 2.3% |
| Shenkangfu capsule 2            | 1 | 2.3% |
| Fufang Xuanju capsule           | 1 | 2.3% |
| Compound Congrong Yizhi capsule | 1 | 2.3% |
| Zhizhu Kuanzhong capsule        | 1 | 2.3% |
| Rougan Hepi pill                | 1 | 2.3% |

Table20 Utilization rate of Chinese patent medicine in TCM hospital

| Name                            | Frequency | Percentage |
|---------------------------------|-----------|------------|
| Bailingcapsule(tablet)          | 5         | 8%         |
| Compound Danshen dropping pill  | 5         | 8%         |
| Naoxintong capsule              | 4         | 7%         |
| Lianhua Qingwengranule(capsule) | 3         | 5%         |
| Jinshuibao pill                 | 3         | 5%         |
| Shensong Yangxin capsule        | 3         | 5%         |
| Compound Xueshuantong capsule   | 2         | 3%         |
| Ginkgo drop pill (tablet)       | 2         | 3%         |
| Xiyanping injection             | 1         | 2%         |
| Xuebijing injection             | 1         | 2%         |
| Compound Daqing granule         | 1         | 2%         |
| Compound Huangqi jiedu mixture  | 1         | 2%         |
| Maxing Huatan mixture           | 1         | 2%         |
| Yichuanping capsule             | 1         | 2%         |
| Yifei Jiedu granule             | 1         | 2%         |
| Honghua Qinggan pill            | 1         | 2%         |
| Huachansu capsule               | 1         | 2%         |
| Danqi capsule                   | 1         | 2%         |
| Xuefu Zhuyu capsule             | 1         | 2%         |
| Yuxuebi capsule                 | 1         | 2%         |
| Tongxinluo capsule              | 1         | 2%         |
| Xiaoshuan Changyong capsule     | 1         | 2%         |
| Sanqi Shutongcapsule            | 1         | 2%         |
| Tiandan Tongluo capsule         | 1         | 2%         |
| Xueshuantong granule            | 1         | 2%         |
| Qili Qiangxin capsule           | 1         | 2%         |
| Xiongdan capsule                | 1         | 2%         |
| Shenqi Duotang oral liquid      | 1         | 2%         |
| Lingling capsule                | 1         | 2%         |
| Shengxuebao mixture             | 1         | 2%         |
| Wenxin granule                  | 1         | 2%         |

|                          |   |    |
|--------------------------|---|----|
| Shenqi Gankang capsule   | 1 | 2% |
| Zhizhu Kuanzhong capsule | 1 | 2% |
| Rougan Hepi pill         | 1 | 2% |
| Shenshuaining capsule    | 1 | 2% |
| Shenyan Kangfu tablet    | 1 | 2% |
| Shenkangfu capsule 2     | 1 | 2% |
| Fufang Xuanju capsule    | 1 | 2% |
| Xianling Gubao capsule   | 1 | 2% |
| Yishen Huashi granule    | 1 | 2% |

Table21 Utilization rate of Chinese patent medicine in western medical hospital

| Name                            | Frequency | Percentage |
|---------------------------------|-----------|------------|
| Bailing capsule                 | 2         | 11%        |
| Lianhua Qingwen granule         | 1         | 5.2%       |
| Jinhua Qinggan granule          | 1         | 5.2%       |
| Lanqin oral liquid              | 1         | 5.2%       |
| Antivirus oral liquid           | 1         | 5.2%       |
| Zhenbao pill                    | 1         | 5.2%       |
| Feilike mixture                 | 1         | 5.2%       |
| Compound Danshen dropping pill  | 1         | 5.2%       |
| Naoxintong capsule              | 1         | 5.2%       |
| Linaoxin tablet                 | 1         | 5.2%       |
| Xueshuan Xinmaining tablet      | 1         | 5.2%       |
| Xintong oral liquid             | 1         | 5.2%       |
| Dengzhan Shengmai capsule       | 1         | 5.2%       |
| Jinshuibao pill                 | 1         | 5.2%       |
| Shensong Yangxin capsule        | 1         | 5.2%       |
| Congrong Yishen granule         | 1         | 5.2%       |
| Compound Congrong Yizhi capsule | 1         | 5.2%       |
| Xinyuan capsule                 | 1         | 5.2%       |

Table22 Frequently-used Traditional Chinese Medicine in 24 hospitals

| Name                           | Frequency | Percentage |
|--------------------------------|-----------|------------|
| Bailing capsule                | 7         | 16%        |
| Compound Danshen dropping pill | 6         | 14%        |

|                                  |   |     |
|----------------------------------|---|-----|
| Naoxintong capsule               | 5 | 11% |
| Jinshuibao pill                  | 5 | 11% |
| Lianhua Qingwen granule(capsule) | 4 | 9%  |
| Huachansu capsule                | 2 | 5%  |
| Tiandan Tongluo capsule          | 2 | 5%  |
| Kangfuxin liquid                 | 2 | 5%  |
| Shensong Yangxin                 | 2 | 5%  |
| Lanqin oral liquid               | 2 | 5%  |
| Maizhiling tablet                | 2 | 5%  |
| Yuxuebi capsule                  | 2 | 5%  |
| Huangkui capsule                 | 2 | 5%  |

Table23 Utilization rate of Chinese patent medicine in high-risk area

| Name                             | Frequency | Percentage |
|----------------------------------|-----------|------------|
| Bailingcapsule(tablet)           | 6         | 10%        |
| Compound Danshen dropping pill   | 4         | 6%         |
| Naoxintong capsule               | 4         | 6%         |
| Jinshuibao pill                  | 4         | 6%         |
| Lianhua Qingwen granule(capsule) | 3         | 5%         |
| Lanqin oral liquid               | 2         | 3%         |
| Huachansu capsule                | 2         | 3%         |
| Huangkui capsule                 | 2         | 3%         |
| Maizhiling tablet                | 2         | 3%         |
| Tiandan Tongluo capsule          | 2         | 3%         |
| Jinhua Qinggan granule           | 1         | 1.7%       |
| Chonglian oral liquid            | 1         | 1.7%       |
| Compound Daqing granule          | 1         | 1.7%       |
| Jingyin mixture                  | 1         | 1.7%       |
| Feilike mixture                  | 1         | 1.7%       |
| Niuhuang Qingxin pill            | 1         | 1.7%       |
| Longqing tablet                  | 1         | 1.7%       |
| Zhenbao pill                     | 1         | 1.7%       |
| Honghua Qinggan thirteen pill    | 1         | 1.7%       |
| Shengxuebao mixture              | 1         | 1.7%       |
| Shensong Yangxin                 | 1         | 1.7%       |
| Longlu capsule                   | 1         | 1.7%       |
| Mingmu Yanggan pill              | 1         | 1.7%       |
| Jiuwei Zhenxin granule           | 1         | 1.7%       |
| Weimaining capsule               | 1         | 1.7%       |
| Lishukang capsule                | 1         | 1.7%       |
| Qiwei Wenyang capsule            | 1         | 1.7%       |
| Congrong Yishen granule          | 1         | 1.7%       |



|                                                     |   |      |
|-----------------------------------------------------|---|------|
| Wenxin granule                                      | 1 | 1.7% |
| Shenyan Kangfu tablet                               | 1 | 1.7% |
| Huoxue Tongmai capsule                              | 1 | 1.7% |
| Salvia miltiorrhiza polyphenolic acid for injection | 1 | 1.7% |
| Compound Xueshuantong capsule                       | 1 | 1.7% |
| Xueshuan Xinmaining tablet                          | 1 | 1.7% |
| Yindan Xinnaotong soft capsule                      | 1 | 1.7% |
| Xiaoshuan Tongluo capsule                           | 1 | 1.7% |
| Yuxuebi capsule                                     | 1 | 1.7% |
| Xiaoshuan Changyong capsule                         | 1 | 1.7% |
| Qufeng Zhitong pill                                 | 1 | 1.7% |
| Honghua Xiaoyaotablet                               | 1 | 1.7% |

Table24 Utilization rate of Chinese patent medicine in low-risk area

| Name                           | Frequency | Percentage |
|--------------------------------|-----------|------------|
| Compound Danshen dropping pill | 2         | 10%        |
| Lianhua Qingwen granule        | 1         | 5%         |
| Zhizhu Kuanzhong capsule       | 1         | 5%         |
| Bailingcapsule                 | 1         | 5%         |
| Shensong Yangxin               | 1         | 5%         |
| Jinshuibao pill                | 1         | 5%         |
| Fufang Xuanju capsule          | 1         | 5%         |
| Gujin pill                     | 1         | 5%         |
| Kangfuxin liquid               | 1         | 5%         |
| Xianling Gubao capsule         | 1         | 5%         |
| Longlu pill                    | 1         | 5%         |
| Naoxintong capsule             | 1         | 5%         |
| Tongxinluo capsule             | 1         | 5%         |
| Guanxin Danshen dropping pill  | 1         | 5%         |
| Yinxing Mihuan oral liquid     | 1         | 5%         |
| Xuefu Zhuyu capsule            | 1         | 5%         |
| Yuxuebi capsule                | 1         | 5%         |
| Danqi soft capsule             | 1         | 5%         |
| moxa stick                     | 1         | 5%         |
| Suxiao Jiuxin pill             | 1         |            |

Table25 Utilization rate of Chinese patent medicine in southern region

| Name                           | Frequency | Percentage |
|--------------------------------|-----------|------------|
| Bailing capsule(tablet)        | 5         | 13%        |
| Compound Danshen dropping pill | 4         | 11%        |

|                                |   |      |
|--------------------------------|---|------|
| Naoxintong capsule             | 3 | 8%   |
| Jinshuibao pill                | 2 | 5%   |
| Lianhua Qingwen capsule        | 1 | 2.7% |
| Lanqin oral liquid             | 1 | 2.7% |
| Compound Daqing granule        | 1 | 2.7% |
| Chonglian oral liquid          | 1 | 2.7% |
| Jingyin mixture                | 1 | 2.7% |
| Feilike mixture                | 1 | 2.7% |
| Huachansu capsule              | 1 | 2.7% |
| Huangkui capsule               | 1 | 2.7% |
| Longqing tablet                | 1 | 2.7% |
| Weimaining capsule             | 1 | 2.7% |
| Shenyan Kangfu tablet          | 1 | 2.7% |
| Longlu capsule                 | 1 | 2.7% |
| Lishukang capsule              | 1 | 2.7% |
| Qiwei Wenyang capsule          | 1 | 2.7% |
| Congrong Yishen granule        | 1 | 2.7% |
| Shengxuebao mixture            | 1 | 2.7% |
| Wenxin granule                 | 1 | 2.7% |
| Honghua Xiaoyao tablet         | 1 | 2.7% |
| Qufeng Zhitong pill            | 1 | 2.7% |
| Tiandan Tongluo capsule        | 1 | 2.7% |
| Xiaoshuan Changyong capsule    | 1 | 2.7% |
| Yindan Xinnaotong soft capsule | 1 | 2.7% |

Table26 Utilization rate of Chinese patent medicine in northern region

| <b>Name</b>                    | <b>Frequency</b> | <b>Percentage</b> |
|--------------------------------|------------------|-------------------|
| Lianhua Qingwen capsule        | 3                | 7%                |
| Jinshuibao pill                | 3                | 7%                |
| Naoxintong capsule             | 2                | 5%                |
| Bailing capsule                | 2                | 5%                |
| Compound Danshen dropping pill | 2                | 5%                |
| Kangfuxin liquid               | 2                | 5%                |
| Shensong Yangxin               | 2                | 5%                |
| Yuxuebi capsule                | 2                | 5%                |
| Jinhua Qinggan granule         | 1                | 2%                |
| Huangkui capsule               | 1                | 2%                |
| Lanqin oral liquid             | 1                | 2%                |
| Yinxing Mihuan oral liquid     | 1                | 2%                |
| Huachansu capsule              | 1                | 2%                |
| Zhenbao pill                   | 1                | 2%                |
| Honghua Qinggan thirteen pill  | 1                | 2%                |
| Niuhuang Qingxin pill          | 1                | 2%                |

|                                                     |   |    |
|-----------------------------------------------------|---|----|
| Xianling Gubao capsule                              | 1 | 2% |
| Longlu pill                                         | 1 | 2% |
| Gujin pill                                          | 1 | 2% |
| Fufang Xuanju capsule                               | 1 | 2% |
| Mingmu Yanggan pill                                 | 1 | 2% |
| Jiuwei Zhenxin granule                              | 1 | 2% |
| Zhizhu Kuanzhong capsule                            | 1 | 2% |
| Compound Xueshuantong capsule                       | 1 | 2% |
| Salvia miltiorrhiza polyphenolic acid for injection | 1 | 2% |
| Xuefu Zhuyu capsule                                 | 1 | 2% |
| Danqi soft capsule                                  | 1 | 2% |
| Xueshuan Xinmaining tablet                          | 1 | 2% |
| Tiandan Tongluo capsule                             | 1 | 2% |
| Xiaoshuan Tongluo capsule                           | 1 | 2% |
| Huoxue Tongmaicapsule                               | 1 | 2% |
| Tongxinluo capsule                                  | 1 | 2% |
| Suxiao Jiuxin pill                                  | 1 | 2% |
| Guanxin Danshen dropping pill                       | 1 | 2% |
| moxa stick                                          | 1 | 2% |

Table27 Utilization rate of Chinese patent medicine in TCM hospital

| Name                             | Frequency | Percentage |
|----------------------------------|-----------|------------|
| Bailingcapsule(tablet)           | 7         | 12%        |
| Jinshuibao pill                  | 5         | 9%         |
| Naoxintong capsule               | 4         | 7%         |
| Compound Danshen dropping pill   | 4         | 7%         |
| Lianhua Qingwen capsule(granule) | 2         | 3%         |
| Huangkui capsule                 | 2         | 3%         |
| Shensong Yangxin                 | 2         | 3%         |
| Yuxuebi capsule                  | 2         | 3%         |
| Longlu capsule( pill)            | 2         | 3%         |
| Chonglian oral liquid            | 1         | 2%         |
| Jingyin mixture                  | 1         | 2%         |
| Huachansu capsule                | 1         | 2%         |
| Compound Daqing granule          | 1         | 2%         |
| Honghua Qinggan thirteen pill    | 1         | 2%         |
| Longqing tablet                  | 1         | 2%         |
| Weimaining capsule               | 1         | 2%         |
| Zhizhu Kuanzhong capsule         | 1         | 2%         |
| Shengxuebao mixture              | 1         | 2%         |
| Wenxin granule                   | 1         | 2%         |
| Shenyan Kangfu tablet            | 1         | 2%         |

|                                                        |   |    |
|--------------------------------------------------------|---|----|
| Xianling Gubao capsule                                 | 1 | 2% |
| Lishukang capsule                                      | 1 | 2% |
| Fufang Xuanju capsule                                  | 1 | 2% |
| Mingmu Yanggan pill                                    | 1 | 2% |
| Gujin pill                                             | 1 | 2% |
| Kangfuxin liquid                                       | 1 | 2% |
| Danqi soft capsule                                     | 1 | 2% |
| Honghua Xiaoyao tablet                                 | 1 | 2% |
| Salvia miltiorrhiza polyphenolic acid<br>for injection | 1 | 2% |
| Guanxin Danshen dropping pill                          | 1 | 2% |
| Tongxinluo capsule                                     | 1 | 2% |
| Tiandan Tongluo capsule                                | 1 | 2% |
| Xuefu Zhuyu capsule                                    | 1 | 2% |
| Compound Xueshuantong capsule                          | 1 | 2% |
| Suxiao Jiuxin pill                                     | 1 | 2% |
| Yinxing Mihuan oral liquid                             | 1 | 2% |
| moxa stick                                             | 1 | 2% |

Table28 Utilization rate of Chinese patent medicine in western medical hospital

| Name                           | Frequency | Percentage |
|--------------------------------|-----------|------------|
| Lianhua Qingwen granule        | 2         | 11%        |
| Lanqin oral liquid             | 2         | 11%        |
| Jinhua Qinggan granule         | 1         | 5.2%       |
| Huachansu capsule              | 1         | 5.2%       |
| Niuhuang Qingxin pill          | 1         | 5.2%       |
| Zhenbao pill                   | 1         | 5.2%       |
| Feilike mixture                | 1         | 5.2%       |
| Qiwei Wenyang capsule          | 1         | 5.2%       |
| Congrong Yishen granule        | 1         | 5.2%       |
| Kangfuxin liquid               | 1         | 5.2%       |
| Jiuwei Zhenxin granule         | 1         | 5.2%       |
| Compound Danshen dropping pill | 1         | 5.2%       |
| Huoxue Tongmai capsule         | 1         | 5.2%       |
| Xueshuan Xinmaining tablet     | 1         | 5.2%       |
| Xiaoshuan Tongluo capsule      | 1         | 5.2%       |
| Tiandan Tongluo capsule        | 1         | 5.2%       |
| Yindan Xinnaotong soft capsule | 1         | 5.2%       |
